# Supplementary material
Source: ML conference proceedings conference paper supplement (https://www.ecva.net/papers/eccv_2024/papers_ECCV/html/8296_ECCV_2024_paper.php)
Supplement: Supplementary file 1 [file 08296-supp.pdf]

## 7 Supplemental Materials

### 7.1 Qualitative Results

Based on Fig. 5, we see excellent tracking performance of JDT3D. Properly detected tracks can maintain excellent consistency, even through difficult scenarios like occlusion. The visualizations also show the model’s ability to predict the future trajectories of tracks in the scene properly.

A video of the visualizations can be found at:  
<https://youtu.be/yv9vrpCSqR8?si=Y3pK6todbxqUIUhV>

### 7.2 Full Results

We include a full table of class-specific metrics on both the nuScenes test and validation sets in Tab. 10 and Tab. 11, respectively.

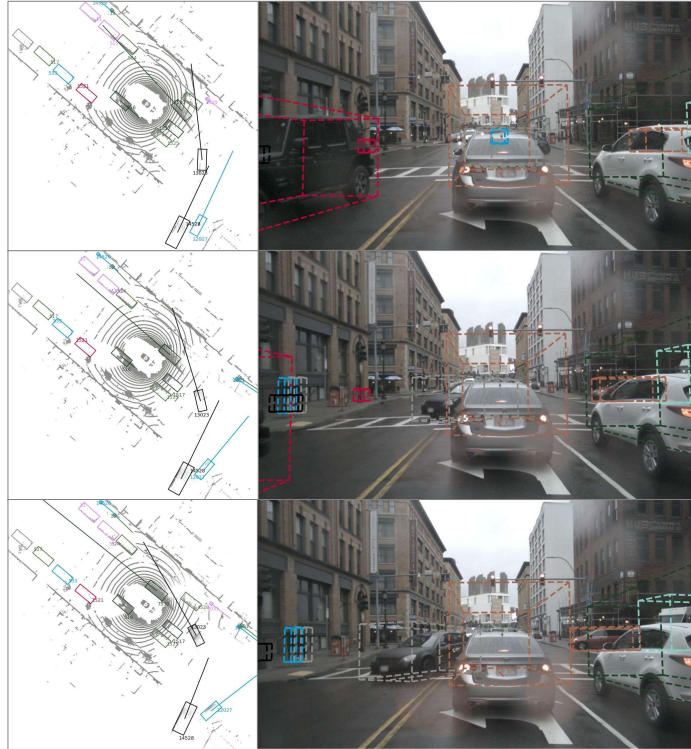

**Fig. 5:** Qualitative results of JDT3D on a scene (consecutive frames from top to bottom) from nuScenes test set. For visual understanding, we show 3D bounding boxes projected into the BEV point cloud and the centre front camera image. Each bounding box has a unique track ID and is coloured accordingly. Line segments represent predicted future trajectories.

**Table 10:** Full results by class for JDT3D evaluated on the nuScenes test set.

| Class      | AMOTA | AMOTP | RECALL | MOTAR | MOTA  | MOTP  | MT   | ML  | FAF  | TP    | FP   | FN    | IDS | FRAG | TID  | LGD  |
|------------|-------|-------|--------|-------|-------|-------|------|-----|------|-------|------|-------|-----|------|------|------|
| Bicycle    | 0.262 | 1.104 | 0.321  | 0.675 | 0.217 | 0.222 | 43   | 124 | 16.3 | 702   | 228  | 1484  | 0   | 3    | 0.68 | 0.80 |
| Bus        | 0.674 | 0.755 | 0.636  | 0.909 | 0.578 | 0.363 | 56   | 35  | 7.1  | 1082  | 99   | 619   | 0   | 1    | 0.64 | 0.71 |
| Car        | 0.751 | 0.613 | 0.795  | 0.901 | 0.714 | 0.255 | 2957 | 845 | 92.3 | 54352 | 5403 | 14042 | 124 | 210  | 0.60 | 1.00 |
| Motorcycle | 0.495 | 0.800 | 0.456  | 0.885 | 0.403 | 0.228 | 47   | 98  | 8.3  | 886   | 102  | 1058  | 1   | 3    | 0.56 | 0.80 |
| Pedestrian | 0.715 | 0.702 | 0.753  | 0.867 | 0.650 | 0.318 | 1284 | 449 | 66.4 | 25474 | 3379 | 8409  | 127 | 151  | 0.65 | 1.03 |
| Trailer    | 0.616 | 0.906 | 0.631  | 0.810 | 0.511 | 0.507 | 77   | 57  | 27.4 | 1619  | 308  | 947   | 0   | 11   | 1.15 | 1.41 |
| Truck      | 0.504 | 0.979 | 0.611  | 0.691 | 0.422 | 0.351 | 210  | 183 | 39.9 | 5277  | 1633 | 3360  | 2   | 8    | 1.16 | 1.69 |

**Table 11:** Full results by class for JDT3D evaluated on the nuScenes validation set.

| Class      | AMOTA  | AMOTP  | Recall | MOTAR  | MOTA   | MOTP   | MT   | ML  | FAF   | TP    | FP   | FN    | IDS | FRAG | TID    | LGD    |
|------------|--------|--------|--------|--------|--------|--------|------|-----|-------|-------|------|-------|-----|------|--------|--------|
| Bicycle    | 0.3981 | 0.860  | 0.4711 | 0.6876 | 0.3236 | 0.1813 | 46   | 92  | 18.6  | 938   | 293  | 1054  | 1   | 1    | 1.285  | 1.354  |
| Bus        | 0.8117 | 0.6328 | 0.8229 | 0.9216 | 0.7571 | 0.4113 | 75   | 17  | 8.5   | 1735  | 136  | 374   | 3   | 14   | 0.5652 | 1.114  |
| Car        | 0.7827 | 0.5686 | 0.7944 | 0.9308 | 0.7386 | 0.2514 | 2361 | 746 | 55.76 | 46276 | 3204 | 11992 | 49  | 106  | 0.5708 | 0.8826 |
| Motorcycle | 0.6376 | 0.6847 | 0.6657 | 0.7673 | 0.5104 | 0.2857 | 66   | 46  | 20.21 | 1315  | 306  | 661   | 1   | 2    | 1.201  | 1.316  |
| Pedestrian | 0.7357 | 0.6806 | 0.7763 | 0.862  | 0.6662 | 0.3296 | 1044 | 373 | 59.47 | 19649 | 2712 | 5688  | 86  | 90   | 0.6434 | 0.9963 |
| Trailer    | 0.4511 | 1.124  | 0.4969 | 0.7535 | 0.3744 | 0.5834 | 51   | 74  | 26.88 | 1205  | 297  | 1220  | 0   | 8    | 0.7623 | 1.287  |
| Truck      | 0.5321 | 0.9763 | 0.6556 | 0.7204 | 0.4716 | 0.3652 | 252  | 166 | 46.09 | 6317  | 1766 | 3323  | 10  | 25   | 1.066  | 1.763  |
